# 1 Ornament, armament, or toolkit? Modelling how population size drives the evolution of 2 birdsong, a functional cultural trait

3  
4 Emily J. Hudson<sup>1</sup> and Nicole Creanza<sup>1</sup>

5  
6 1. Department of Biological Sciences, Vanderbilt University, Nashville, TN 37240, USA

## 7 Abstract

8 Oscine songbirds have been an important study system for social learning, particularly because  
9 their learned songs provide an analog for human languages and music. Here we propose a  
10 different analogy; from an evolutionary perspective, could a bird's song be more like an  
11 arrowhead than an aria? We modify an existing model of human tool evolution to accommodate  
12 cultural evolution of birdsong: each song learner chooses the most skilled available tutor to  
13 emulate, and more likely produces an inferior copy than a superior one. Similarly to human tool  
14 evolution, we show that larger populations foster greater improvements in song over time, even  
15 when learners restrict their pool of tutors to a subset of individuals. We also demonstrate that  
16 randomly sampling tutors from the population offers no clear benefit over sampling only existing  
17 connections in a structured social network, and that by allowing a lower quality trait to be easier  
18 to imitate than a higher quality one, simpler songs can be maintained after population  
19 bottlenecks. We show that these processes could plausibly generate empirically observed patterns  
20 of song evolution, and we make predictions about the types of song elements most likely to be  
21 lost when populations shrink. More broadly, we aim to connect the modeling approaches used by  
22 researchers studying social learning in human and non-human systems, moving toward a  
23 cohesive theoretical framework that accounts for both cognitive and demographic processes.

## 24 Introduction

25 Social learning—"learning that is facilitated by observation of, or interaction with,  
26 another individual or its products" [1,2]—is pervasive across the animal kingdom, from  
27 invertebrates [3–5] to cetaceans [6] and primates [7]. Social learning is a special case of

inheritance that provides a non-genetic pathway for adaptive traits to be passed on from one generation to the next. How does the pattern and process of evolution differ when important traits are learned rather than transmitted genetically between generations? In the 20th century, the discovery of genes as the primary unit of inheritance meant that Darwin's ideas about natural selection could be synthesized with an underlying mechanism of transmission. A similar synthesis between genetics, evolutionary processes, and broad behavioral patterns is still needed for learned traits. In combination with experiments investigating the mechanisms of learning, mathematical models can help generate hypotheses and test assumptions about cognitive processes related to the transmission of social information.

The oscine songbirds offer a promising system for modeling the interaction of evolution and culture; like humans, members of this group of songbirds must undergo a learning process in order to produce effective vocal communications. In contrast to language, however, bird song is often shaped by the transmission properties of the environment, such as foliage density [8,9] or background noise [10]. Most notably, much research on birdsong has focused on social selection, including female preferences for song elaboration or vocal performance (reviewed in [11,12] but see [13]). These preference-shaped features are (to varying degrees) socially transmitted and constrained by the availability of tutors. For example, even if the song trait of repertoire size has a genetic and developmental component [14–16], pupils with a small pool of potential tutors will be limited in the types of sounds from which to build their repertoires [17]. Returning to an analogy with human culture, then, subtle variations in a bird's song can potentially be linked to fitness differences, much like the skill to craft a sharp arrowhead can translate to increased fitness for a human hunter. In both cases, a pupil's learned skill depends on the social environment in which it learns.

Here, we propose that treating birdsong as a functional tool is a novel and complementary approach to analogizing birdsong to human language. Although songs, unlike tools, are not physical objects, songs have fitness consequences and may experience cumulative cultural change towards a more effective version (which rarely happens in language). By emphasizing song's functional aspects, we gain new methods to understand its evolutionary dynamics and how demographic factors affect song over time. We use a cultural evolutionary approach to

social learning and human tool evolution [18] to make predictions about song evolution. In essence, we represent song as a difficult skill that all learners in the population attempt to reproduce with varying success. This simple but powerful framework has yielded novel insights into human behavior (e.g. [19]; discussed in more detail below), and it holds promise to do the same for cultural traits in other species. In particular, this approach provides a specific mechanism to explain why attractive elements of song are sometimes lost when bird species expand into new habitat and experience an associated population bottleneck. Unlike cultural drift, which can be dominated by random processes, the model we propose here incorporates selection—the assumption that certain forms of a cultural trait are beneficial or preferable—while integrating population demographics and specific aspects of cognitive ability [20–24]. Additionally, we apply the tools of social network analysis to show how changing population connectivity affects trait evolution. Finally, we model the outcome if trait difficulty varies with the elaboration of the trait, for example, if less attractive songs are easier to learn and transmit than more attractive ones.

71

## 72 **Basic model**

In the tradition of anthropologists and cultural evolutionary theorists [25–27], Henrich [18] applied mathematical models to show that the progressive loss of complex skills observed across several thousand years of the Tasmanian archaeological record was best explained as an outcome of demographic factors (namely, effective population size), rather than adaptations to the climate or consequences of cognitive declines [28–30]. In Henrich’s mathematical model, a learned trait (such as a netweaving technique, or the straightness of an arrow shaft, p. 200 of ref. [18]) gradually improves or declines across generations in a culture, depending on the interaction of three factors: 1) how difficult the trait is to accurately copy ( $\alpha$ ), 2) how widely learners vary in their attempts to copy the trait ( $\beta$ ), and 3) how many learners and potential tutors exist in the current population ( $N$ ), a non-cognitive factor that nevertheless plays an important role in cultural change. Henrich describes the relationship of these terms in a modified Price equation:

$$\Delta \bar{z} = -\alpha + \beta(\epsilon + \ln(N)) \quad (1)$$

Here  $\Delta \bar{z}$  is the population-level mean change in the skill level of a culturally transmitted behavioral trait, and  $\varepsilon$  is Euler's constant ( $\approx 0.577$ ). This equation represents a model of social learning where all individuals attempt to imitate a trait produced by the most competent individual in the previous generation, and there is no limit to the number of individuals that can imitate the same tutor. Population size  $N$  is important because larger populations have more individuals, increasing the probability that an individual produces a superior imitation. It is important to note that there is no direct inheritance in this model, genetic or otherwise; each pupil attempts to imitate the best tutor ( $z_{max}$ ) in the population, and in each generation the resulting  $z$  value for each pupil is drawn from a Gumbel distribution centered at  $z_{max} - \alpha$  (Figure 1). Importantly, and perhaps counterintuitively, the population variation in skill of available tutors does not influence trait change in the next generation in this model; only the highest value tutor is chosen by pupils to attempt to imitate.

Given a trait that is difficult to learn, most individuals will produce inferior imitations and thus only sufficiently large populations will contain enough pupils to consistently produce slightly improved imitations by chance, therefore increasing the maximum value of the trait in the next generation. When  $\Delta \bar{z} > 0$ , the mean skill of the population increases, including the skill of the best tutor in the next generation (Fig 2). Conversely,  $\Delta \bar{z} < 0$  results in a decline in the population's skill over time, shifting the distribution to the left. This process differs from drift in that traits that decline in skill level over time are not random but rather tend to be the most difficult traits to imitate [18]. While the application of this model to empirical evidence in human cultural evolution has been widespread, if contentious (e.g. [31–33]), to our knowledge it has never been applied to non-human cultures.

107

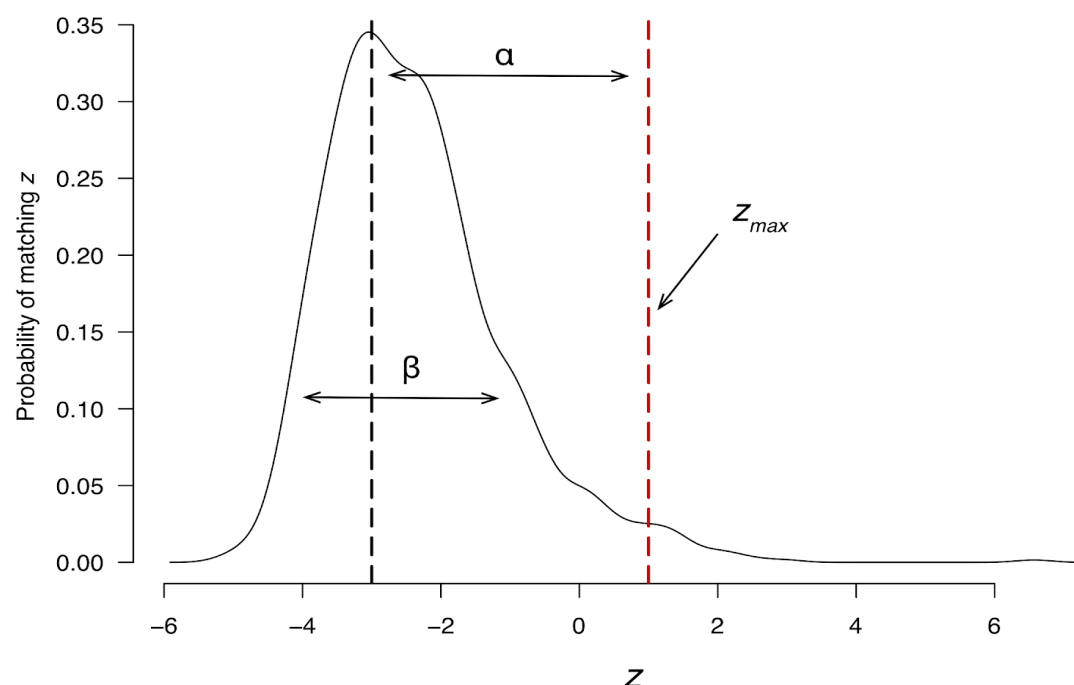

108 **Figure 1.** The probability distribution of a learner attempting to copy a trait with the highest  $z$   
 109 value possible. The trait value  $z$  varies in a population (here,  $N = 100$  individuals). The maximum  
 110  $z$  value of the tutor population,  $z_{\max}$ , is denoted with a dotted red vertical line. The skill a pupil  
 111 acquires is drawn from the shown Gumbel distribution, with its mode (dashed line) set at  $z_{\max} -$   
 112  $\alpha$  and a dispersion of  $\beta$ . As this distribution shows, most pupils in the population will end up  
 113 learning to produce the trait with  $z$  values below the maximum possible value; by chance,  
 114 however, some individuals will produce imitations in the far right tail of the distribution, such  
 115 that large populations are more likely to exceed the previous maximum value in the population.

116

117

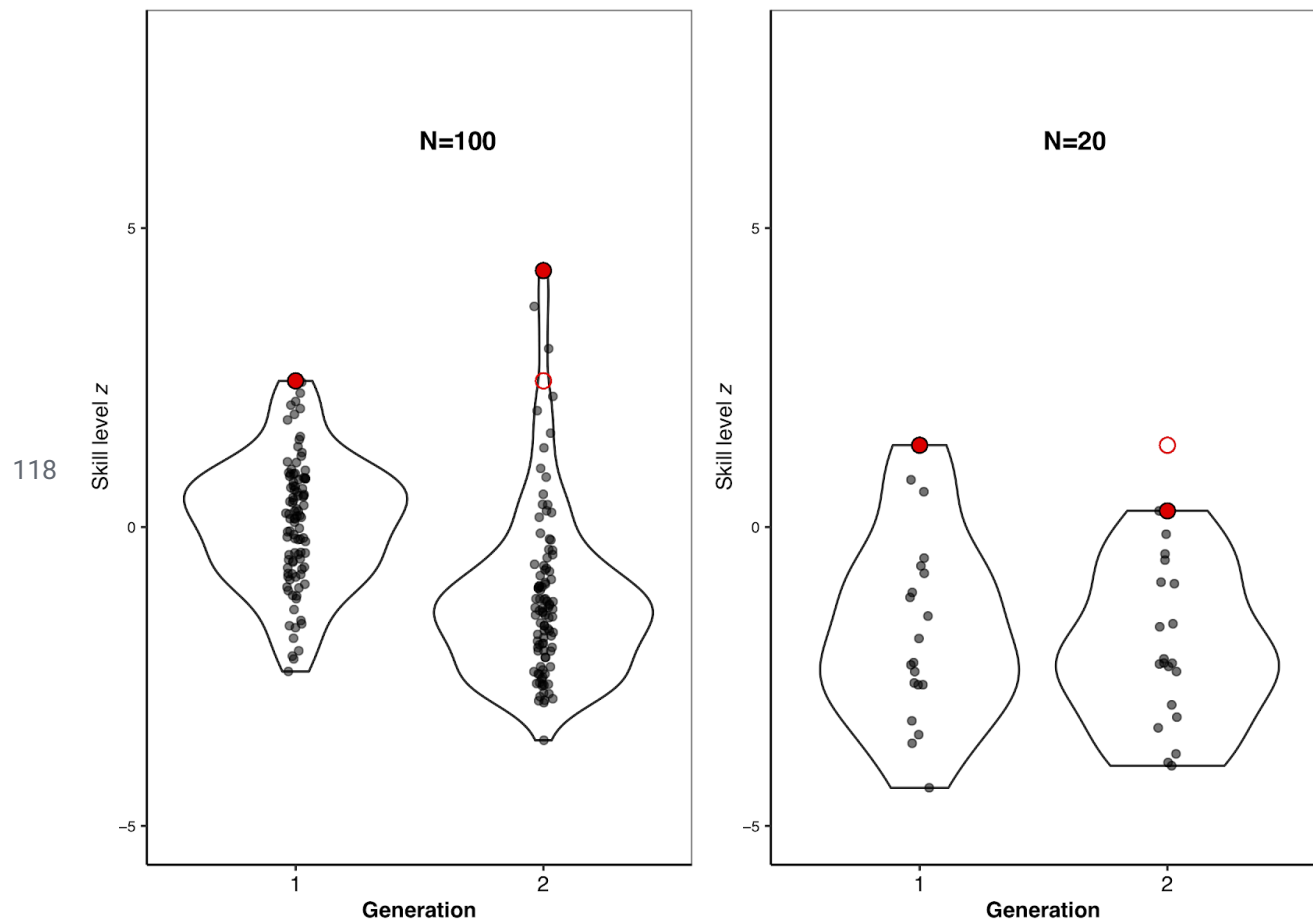

**Figure 2.** The change in maximum population skill level ( $z_{max}$ ) from the first to second timestep when population size is 100 (left) and 20 (right). The second generation learns from the first generation, attempting to copy the example of the most skilled (highest  $z$ ) individual in the population (filled red circle on the left). The open circle shows the maximum  $z$  value of the previous generation. Learners usually fall short of this model; however, in a large enough population, as shown on the left, one or more individuals will by chance improve in relation to the tutor (value of the filled circle in the second generation exceeds that of the open circle). Whenever the maximum value in the subsequent generation exceeds that of the previous generation, the trait will improve over time (value of filled circle exceeds open circle); if the maximum value is less than the previous generation, the mean value for that trait will decrease, as shown on the right.

### Applying the model to birdsong: methods and results

To apply the above model to birdsong, it is necessary to translate the concept of an individual's skill along a continuous axis ( $z$ ) to a measurable feature of song. Linking specific song traits to fitness is challenging, but some authors have shown how reproductive success

relates to particular performance traits in many taxa, including birds (reviewed in Byers et al 2010); for example, in oscine songbirds, a preference for the production of rapidly trilled notes seems widespread [34–37]. Additional song features that are thought to be under selection include repertoire size [38–40] and the production of particular elements [41–44]. Although not all components of birdsong are learned, it is reasonable to compare a male’s ability to copy and produce a successful song (i.e. one that is capable of attracting a mate) with learned skills that increase survival in human cultures. Importantly, for the predictions of the Price equation to apply, it is only necessary for some degree of social inheritance to take place; song traits with partial genetic control can still be modelled if the distribution of learner performance is affected by the availability of skilled tutors. Furthermore, a better song (higher  $z$ ) is defined loosely as any song that increases the singer’s reproductive success and, thus, its fitness. In most oscine birds, this concept can also be expressed as a song that is more attractive from the receiver’s perspective (usually, a prospective female mate).

Henrich’s model assumes that, due to the incentive to produce high-quality imitations of these important traits, learners choose the best tutor in their population to imitate. In swamp sparrows, artificially slowed renditions of natural songs (<40% of the natural speed) are not imitated [45], suggesting that learners at least have a minimum set of criteria for tutor choice. Moreover, in captivity, young males in this species given only accelerated tutor songs will attempt to imitate higher trill rates than they are capable of producing, resulting in atypical syntax with a few trilled notes punctuated by longer silences [46]. Although such “broken” songs are not encountered in nature, young sparrows are able to imitate them in the lab, suggesting both a flexibility that could enable novel song adoption (in cases where such songs are not maladaptive), and a directional preference for copying faster trills. In another species of sparrow, artificial tutor songs with a single note removed were much less likely to be imitated than complete tutor songs, suggesting another kind of threshold for selecting quality tutors [47]. In addition to judging their songs, juvenile birds might also gauge potential tutors using social cues: for example, juveniles may preferentially imitate the songs of older [48] or more aggressive [49] males. This is somewhat analogous to cultural processes of prestige bias and success bias in humans [50–52]: in addition to judging tool quality ( $z$ ), humans can also select

tutors based on social factors. While many aspects of song learning and tutor choice still need to be studied in a natural context, enough is known to construct preliminary models that help explain patterns of song divergence and make predictions that can motivate future fieldwork.

When we apply Henrich's adaptation of the Price equation to birdsong using a generic metric of song quality ( $z$ ), we find, as expected, that the mean skill level of the population decreases over time when population sizes are small (lower  $N$ ) or when traits are more difficult to imitate (higher  $\alpha$ ), and the mean skill level increases when population sizes are larger or when traits are easier to imitate (Figure 3a). The tradeoff between population size ( $N$ ) and trait difficulty ( $\alpha$ ) is shown by the white boundary in the heatmap, where  $\Delta z = 0$  and the skill level remains constant. Above this boundary ( $\Delta z > 0$ ), the trait is expected to decline in quality over time. Conversely, increasing variance in learning ( $\beta$ ) tends to promote an increase in  $z$  over time for a given population size (Figure 3b).

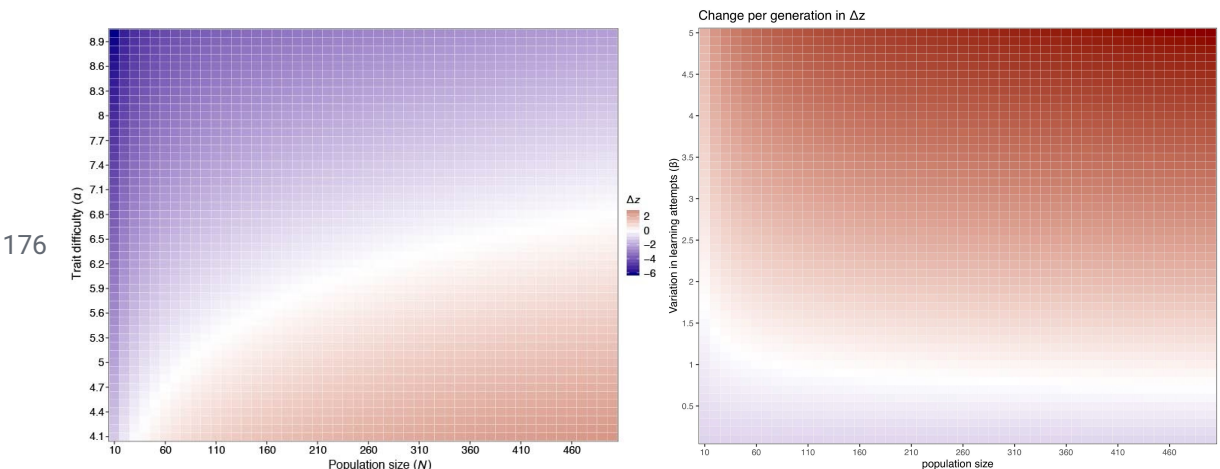

**Figure 3. (a).** The effect of population size ( $N$ ) and trait difficulty ( $\alpha$ ) on the change in mean trait skill level per generation ( $\Delta z$ ), where  $\beta = 1$ . When population size is small, the mean change in learned skill is negative each generation, even for lower values of  $\alpha$  (easier traits). As population size increases, cultural traits that are increasingly difficult to copy (higher  $\alpha$ ) can be maintained and improved (positive  $\Delta z$ ). **(b).** Increased learning variance ( $\beta$ ) promotes the cumulative increase in trait values. Here,  $\alpha = 5$  and  $\beta$  varies between 0 and 5.

#### Application to specific birdsong characteristics:

So far,  $z$  has referred to any generic song trait that is under selection. Next, we apply a variation of this model to specific aspects of learned song. One aspect of birdsong that lends



187 itself well to the Price equation model of cultural evolution is trill rate. This component of song  
 188 is constrained by morphological limits [53], but also by the quality of the tutor song available:  
 189 swamp sparrows presented with only artificially slowed songs could not produce songs reaching  
 190 natural performance levels, although they did improve on their “tutor’s” performance [45].  
 191 Moreover, trill rate is functionally important for mate attraction [34,36,41] and territory defense  
 192 [54–56]. However, several bird species show geographic variation in the rate or presence of trills  
 193 [57–59], raising the question of why these seemingly important features of song are present (or  
 194 more elaborated) in some populations and not others.

195        In Figure 4, we show 20 replicates of possible trajectories of this trait over 60  
 196 generations, starting from a uniform population trill rate of 4 notes per second. Population size  
 197 was set at  $N = 100$  individuals with  $\alpha = 5$  and  $\beta = 1$ . These values were chosen because a  
 198 population of 100 is realistic and not computationally prohibitive, whereas the values of  $\alpha$  and  $\beta$   
 199 represent a “boundary” at which minor changes to parameters will be visible due to changes in  
 200 trait value (see Fig. 3). These replicates differ due to the stochastic sampling of the Gumbel  
 201 distribution in each time step. In the majority of replicates, the mean  $z$  of the population  
 202 decreased over 60 generations; the mean of all replicates was a trill rate of 2.8 notes/second. This  
 203 result suggests that, at these cognitive parameters ( $\alpha$  and  $\beta$ ), a population greater than 100  
 204 individuals is required to maintain trill rate at or close to the physiological limit. It is important to  
 205 note that for most learned birdsong traits, physical or physiological limits exist that will constrain  
 206 song expression; e.g. bill size determines how rapidly a male can trill [60,61], while  
 207 neurophysiology places limits on auditory sensitivity [62,63]. Regardless of this limit, in our  
 208 model smaller populations experience a decline in trill rate as learners, over successive  
 209 generations, largely fail to exceed the skill level of the best tutor of their generation. Thus, over  
 210 time, trills may disappear altogether as the rate becomes so low as to no longer function in mate  
 211 attraction. Indeed, one replicate in this simulation reached a mean  $z < 0$  before 60 generations  
 212 (red line), which we represent as the loss of the trait. While the precise values are in some sense  
 213 arbitrary (100 birds may be adequate to maintain most learned vocal behaviors in nature), this  
 214 example illustrates the general principle that smaller populations are more likely to lose  
 215 difficult-to-imitate traits than large ones.

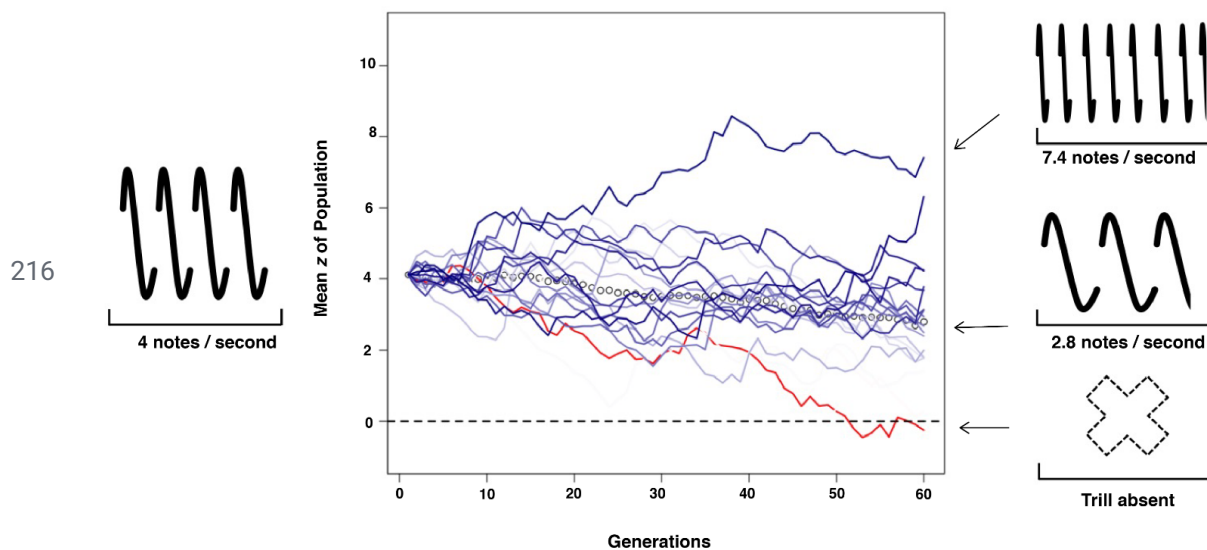

**Figure 4.** The term  $z$  (a measure of skill level in a culturally transmitted trait) in the Price equation here represents the trill rate (number of notes repeated per second). Lines show the mean  $z$  of each replicate population over time. Open circles represent the mean  $z$  value across all 20 replicates for that generation. The range of final  $z$  values (maximum, mean, and minimum) after 60 generations are noted on the right y-axis. Since the simulation is stochastic, some replicates resulted in the cultural trait improving over time (e.g.  $z = 7.4$ , trill rate increased), whereas others resulted in a negative  $z$  and a loss of the trilled syllable (dashed x). For all replicates,  $\alpha = 5$ ,  $\beta = 1$ , and  $N = 100$ .

Even for song characteristics that are more difficult to quantify than trill rate, this model makes useful predictions about the direction of song evolution over time. For example, we can envision a bird's song composed of multiple syllables that vary in their difficulty to learn (Figure 5). In the language of birdsong literature, this would be a more syntactically complex song than one composed of a single repeated note. Like trill rate, syllable and song complexity has been shown to play a role in mate attraction for some species, although the strength and ubiquity of this effect is contested (see meta-analyses by [13,64]). For example, female Bengalese finches prefer songs with higher complexity, but stressful conditions early in life limit a male's syntactical complexity, indicating that these songs are more difficult to produce (large  $\alpha$ ) [65]. Repertoire size is another attractive feature of song that could be negatively affected by low population size. Although repertoire size *per se* may not be a culturally transmitted trait, the

availability of diverse models to copy necessarily limits the achieved repertoire size of imitative learners, as seen in marsh wrens given a small pool of tutors from which to learn [17].

In the event of demographic changes such as population bottlenecks, our model predicts that syllables with a high trait difficulty (large  $\alpha$ ) would be the most likely to disappear from the population, while those that are simpler to learn (smaller  $\alpha$ ) would be maintained even after population size shrank. This differs from the prediction of song component loss through neutral processes (akin to genetic drift), because the loss of syllable types is not random. Rather, we would expect that more difficult-to-imitate syllables would be disproportionately lost if population size is reduced. This is true even if producing these syllables is beneficial to the singer. We illustrate one such scenario in Figure 5, with a hypothetical bird song initially composed of three different syllable types, each with its own imitation difficulty ( $\alpha$  value). We show the results in a single population over 60 generations, in which each note is learned independently following the Price equation. Over 60 generations, the terminal syllable (which is the most difficult to imitate) rapidly decreases in  $z$ , while the middle syllable remains mostly the same and the initial notes increase in  $z$  value (Figure 5). Note that the exact interpretation of the  $z$  value in this context is more complex than in the case of the trill. One way to conceptualize a syllable with a larger  $z$  value is that the syllable is more salient or attractive to receivers (for example, one that is faster, more stereotyped, or more complex). In contrast, a syllable with a lower  $z$  value may be less salient to receivers (and perhaps disappears entirely from the song when  $z = 0$ ).

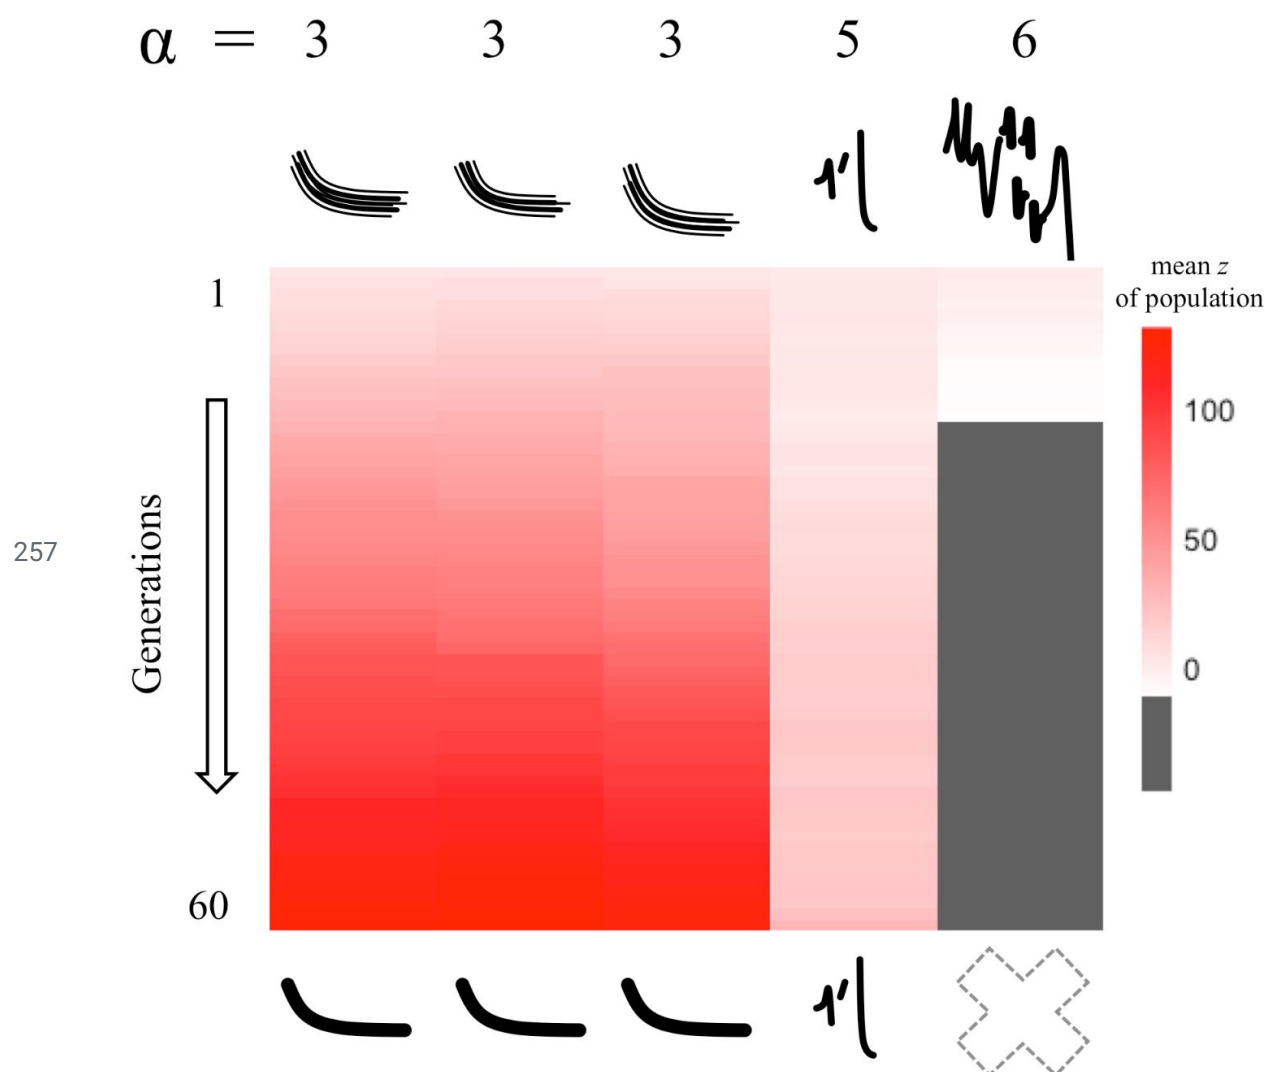

**Figure 5.** An ancestral song composed of 5 syllables of varying difficulty ( $\alpha$ ) is learned by a population of 100 individuals over 60 generations. The mean population value for  $z$  for each syllable (a measure of the attractiveness/effectiveness of that syllable) is indicated by color over time, with red indicating higher values of  $z$ . The first three syllables are relatively easy to learn accurately (lower  $\alpha$ ) and increase in  $z$  over 60 generations, represented here as less noisy, more consistent renditions; by contrast, the fourth syllable is more difficult to accurately learn, and the  $z$  value remains the same over time, while the fifth syllable is the most difficult to learn and quickly reaches a negative  $z$  (gray). In the context of bird song evolution,  $z \leq 0$  can be thought of as a syllable disappearing from a population's song repertoire. This model shows that a population of 100 is more likely to maintain song components below some threshold degree of difficulty (here, the threshold is between  $3 < \alpha < 6$ ).

## 270 **Song learning in a social network**

271         Henrich’s application of the Price equation necessarily simplifies the nature of social  
 272 interaction in a population. Avian researchers might object that the pool of individuals from  
 273 which a male could potentially learn his song is much smaller than the population sizes proposed  
 274 in the examples above. A more sophisticated model would include an estimation of the size of  
 275 both the overall population and those immediately accessible for copying at each timestep.  
 276 Kobayashi and Aoki [66] devised such a model to reflect the fact that most individuals in a  
 277 population are not able to learn from all members; in their model, individuals are randomly  
 278 assigned  $k$  individuals out of the total population as potential cultural tutors, and choose the best  
 279 tutor (highest  $z$ ) from among those  $k$  individuals. Below we extend the methods of Kobayashi  
 280 and Aoki in two ways to apply social network methodology to the question of how song might  
 281 evolve in socially structured populations.

282

### 283 *Disentangling population size ( $N$ ) from connectivity of a network (degree)*

284         A key characteristic of social networks is degree, or the number of connections possessed  
 285 by each member (node) of the network (networks with different degrees are illustrated in Figure  
 286 S1). To tease apart the impact of local social network dynamics from overall population size on  
 287 song evolution, we modeled two different network scenarios. First, we simulated a network with  
 288  $N = 100$  in which every individual was connected to twenty five others in the population (degree  
 289 of 25). Initially, all individuals are assigned a  $z$  value of zero. Thus, in the first time step of our  
 290 model, individuals are assigned an identical tutor randomly from the 25 connected individuals. In  
 291 all following time steps, each individual selects the individual with the highest skill level ( $z$ ) of  
 292 its 25 connections to be its tutor. The likelihood that a pupil exceeds the tutor’s  $z$  value is  
 293 determined by the Gumbel distribution, defined by  $\alpha$  and  $\beta$ , as before.

294         Second, we compared the above network to a fully connected network with  $N = 26$ , such  
 295 that each individual still has 25 connections, but they are to every other individual in the  
 296 population. We found that the larger network with a population of 100 and degree of 25  
 297 consistently achieves a higher mean  $z$  value after 50 generations than a network of 26 fully

connected individuals (Figure 6a), showing that there is indeed a “benefit” to being a part of a larger population—the mean skill level of the population will be higher—even if individuals in both populations only have 25 individuals to learn from at each time step. This benefit, as expected, decreases as the subset  $k$  approaches the size of the whole population (Figure 6b).

302

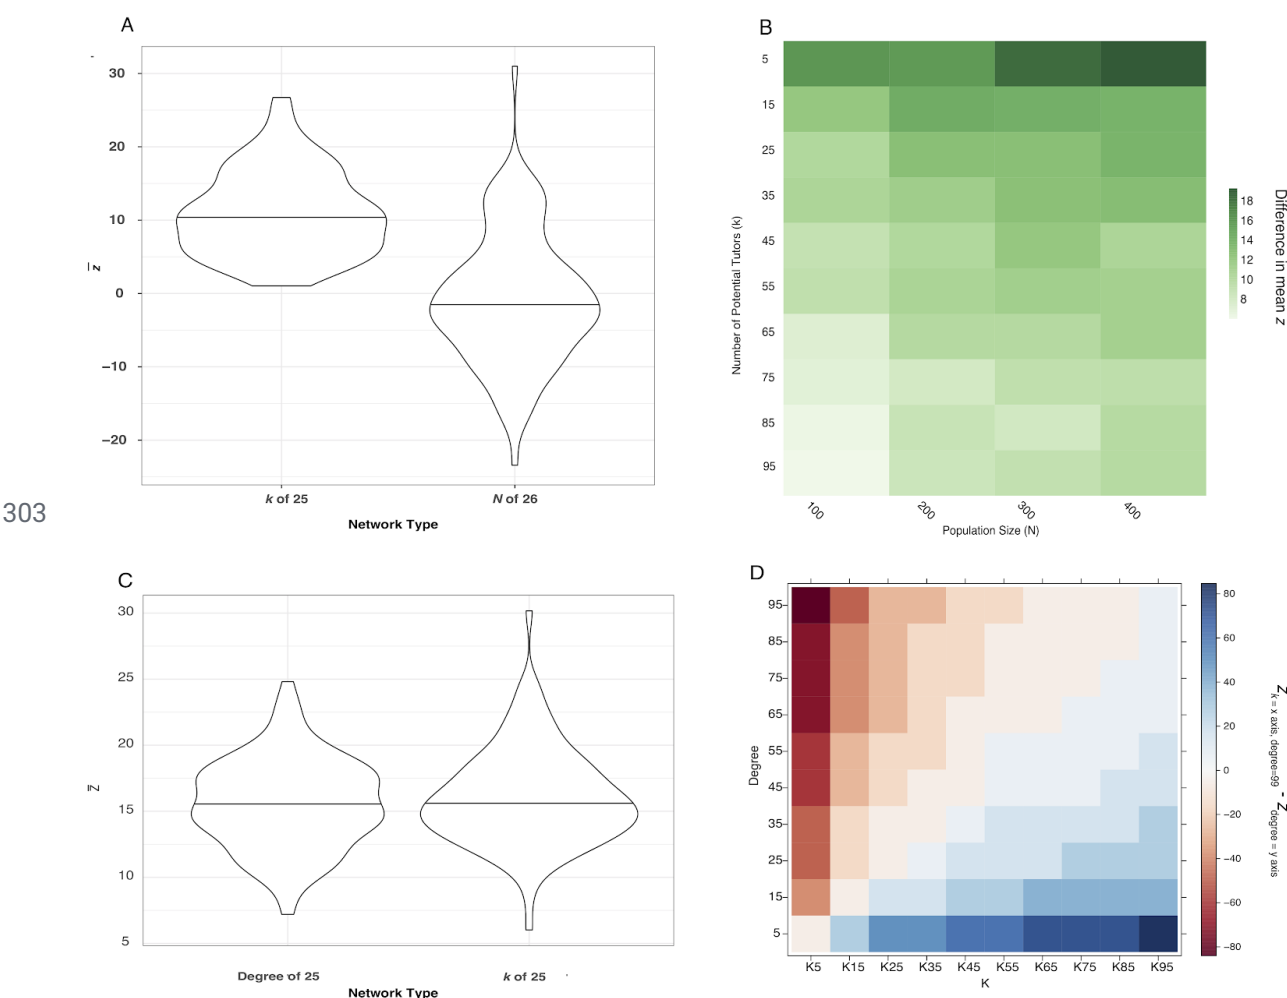

**Figure 6.** (A) The mean  $z$  value of the network in a 100-member network with a uniform degree of 25 (left) and a (fully connected) 26 member network with a uniform degree of 25 (right). Each simulation ran for 50 generations, and the violin plots show the outcome of 100 simulations for each type of network. (B) Each cell shows the difference between the final mean  $z$  of a population after 50 generations with the total  $N$  and  $k$  on the x- and y-axes respectively, and a population with the same parameters but a total  $N$  equal to  $k$ . Values shown are the mean of 20 replicates. (C) The effect of degree (the 25 network connections between nodes are maintained over generations) versus  $k$  (each node draws 25 individuals randomly each generation) on  $z$  over

time.  $N = 100$ , replicates = 100, generations = 100. **(D)** The difference in mean  $z$  after 50 generations for populations where  $N = 100$ , between networks with a  $k$  between 5 and 95 (where  $k$  potential tutors are sampled randomly from the network each timestep), and networks with degree between 5 and 95 (where the same connections are maintained for all 50 timesteps).

### 312 *The effect of randomized versus consistent tutors*

313       Next, we investigated two different scenarios in which only a subset of individuals in the  
314 network were available as potential tutors. In the first, we created a 100-member network and ran  
315 a simulation exactly as before, with each individual connected to 25 others (i.e. the network had  
a uniform degree of 25). Again as before, these individual connections were retained for the  
entire run of 100 generations. At each timestep, each individual chooses the highest  $k$  among its  
connected nodes, and based on that maximum value, generates its new  $z$  value (“learns”)  
according to the Price equation. After every individual in the population has generated a new  $z$   
value, the timestep is completed and the next begins. We replicated this simulation 100 times for  
100 generations each.

316       We also created 100-member networks where each individual had the opportunity to  
317 learn from 25 individuals randomly drawn from the population in each timestep ( $k$  of 25). In  
318 contrast to the previous scenario, the 25 individuals were picked randomly for each individual  
319 during each learning event. We found that a fully connected network in which  $k$  individuals are  
randomly selected as potential tutors, and a network with a degree of  $k$ , yield the same mean  $z$   
after 100 generations, as illustrated in Figure 6c. This suggests that whether the pool of tutors is  
static over multiple generations, or shuffled each time, does not affect the overall outcome of  
song evolution. In other words, re-sampling tutors for each new generation of individuals does  
not provide any benefit for trait evolution by increasing the effective population size. Figure 6d  
illustrates that this pattern holds for values of  $k$  and degree between 5 and 95; when  $k$  and degree  
are the same, the difference in mean  $\bar{z}$  after 50 generations is close to zero (light-colored  
diagonal line).

320

321 **The relationship between trait quality and difficulty: dynamic  $\alpha$  as a function of  $z_{\max}$**

322       Following Henrich [18], we have so far assumed that the value of  $\alpha$  for a given trait  
 323 remains constant over time, regardless of the average skill level or complexity of that trait in the  
 324 population. However, it is plausible that as the skill level of a trait decreases (for example, trill  
 325 rate decreases or syllables become less structurally complex), learners will find it easier to  
 326 successfully imitate. In this case, we would predict a positive correlation between  $\alpha$  and  $z$ : as the  
 327 quality of the trait increases (higher  $z$  values), the trait difficulty should also increase (higher  $\alpha$ )  
 328 and vice versa. Below, we model this scenario by modifying  $\alpha$  at each timestep, according to  
 329 how far above or below the initial  $z$  value the current maximum  $z$  is at that timestep.

330       Incorporating this plausible correlation between  $z$  and  $\alpha$  produced two culturally and  
 331 biologically relevant patterns. First, when  $\alpha$  increases with  $z$ , mean trait performance improves  
 332 until reaching a plateau, rather than a biologically unrealistic linear increase *ad infinitum*. As the  
 333 performance or quality of a trait improves in a population, the trait becomes progressively more  
 334 difficult to learn, acting as a check on the unbounded increase in trait quality seen in the original  
 335 model. Secondly, traits may be maintained after drastic decreases in population size, albeit in  
 336 simpler forms, rather than being lost altogether. In other words, as trait quality or performance  
 337 declines in a small population, the trait becomes progressively easier to transmit and is rescued  
 338 from loss. This concords with the relatively stable song traditions observed in most oscines, even  
 339 in small or isolated populations.



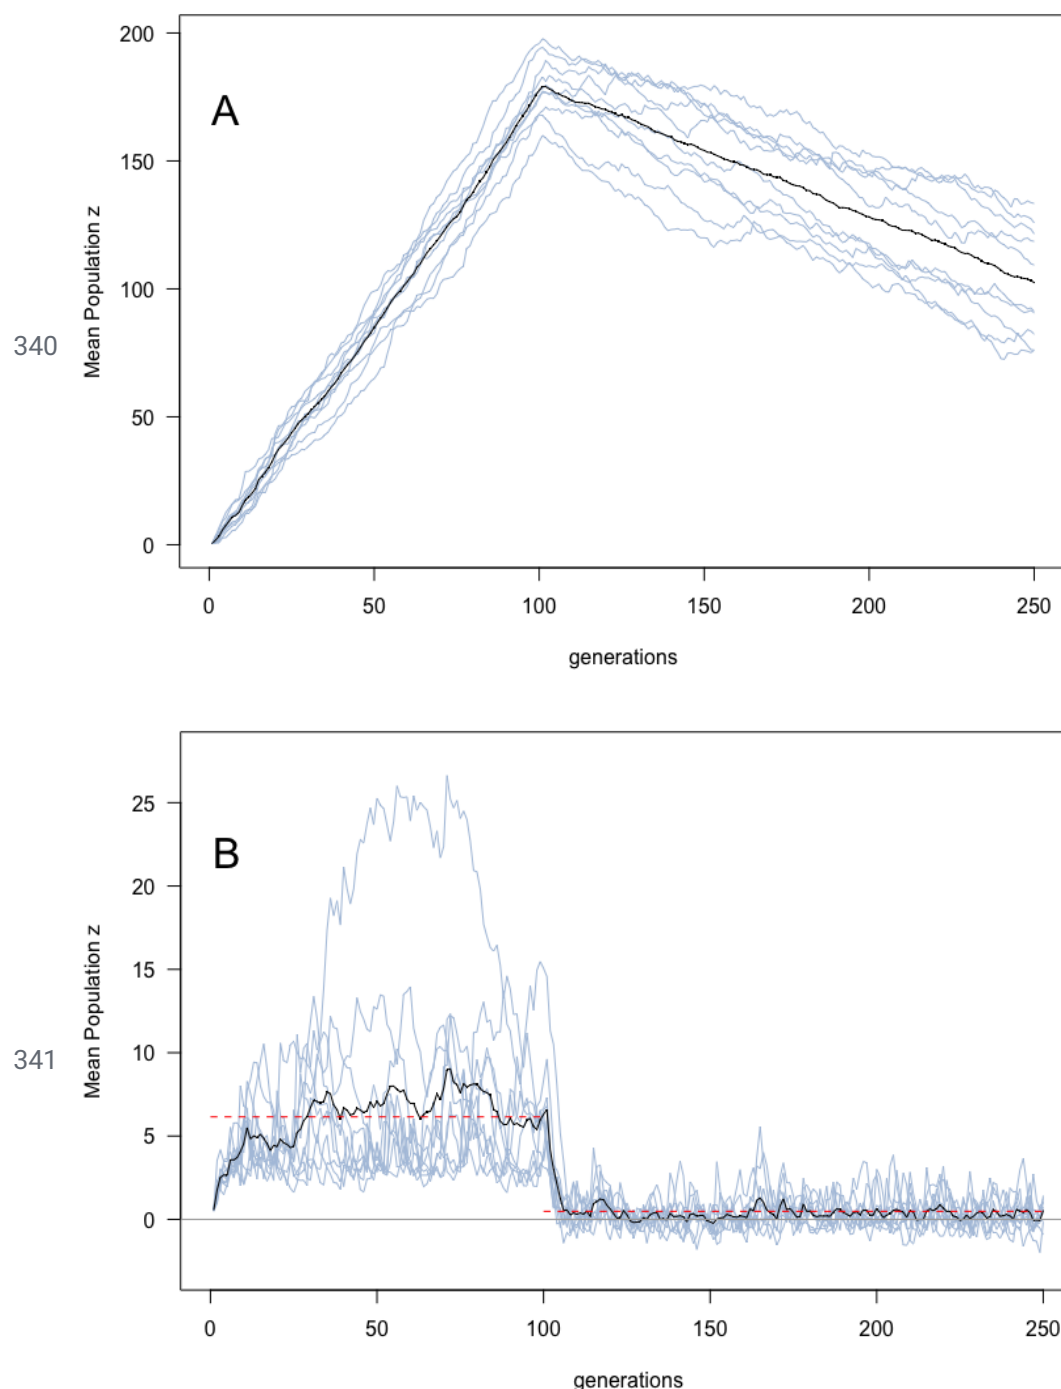

**Figure 7. (A)** In these ten simulations,  $\alpha = 5$ ,  $\beta = 1$ , and the population shrinks from 500 to 50 at generation 50 (note the difference in the y-axes between panels). **(B)** In these ten simulations,  $\alpha$  varies between 3 and 7, changing each timestep depending on the mean value of  $z$ . Other parameters are the same as in the top panel ( $\beta = 1$ , population shrinks from 500 to 50 at generation 50),  $\alpha$  varies between 3 and 7. Change from the original  $z_{\max}$  (10) is used as an index

347 to increase or decrease within a range of possible alphas. Red dotted lines indicate the mean  $z$  for  
 348 the pre- and post-bottleneck populations.  
 349

## 350 Discussion

351 Analogies between research fields can be useful in sparking the application of novel  
 352 techniques to longstanding problems and encouraging interdisciplinary thinking. It is thus worth  
 353 periodically revisiting the scientific analogies we use most, and adopting new and  
 354 complementary ways of thinking about well-studied traits. Birdsong has often been compared to  
 355 human language [67,68] and music [69], both symbolic traits; these analogies have no doubt  
 356 encouraged the many decades of birdsong research in animal behavior, neuroscience, and  
 357 psychology. We argue that re-framing birdsong as a functional tool is likely to spur further  
 358 fruitful research. We draw an analogy between birdsong and human technologies—both of which  
 359 are fitness-enhancing culturally transmitted traits—and leverage models from cultural  
 360 evolutionary theory to shed new light on animal behavior evolution. We have shown, using a  
 361 relatively simple model based on the Price equation, that the size and network stability of a  
 362 population can influence the retention of song traits over time. Population size and network  
 363 structure in turn interact with cognitive parameters, such as the difficulty of copying a certain  
 364 song feature and variance of copying attempts, to shape song evolution. The interaction of  
 365 demographic and cognitive parameters, we argue, is likely to affect the evolution of signals in  
 366 oscine songbirds in similar ways to their effects on the evolution of human cultural traits: the  
 367 structure of a population and the properties of its learned behaviors both play a role in cultural  
 368 evolutionary dynamics. Specifically, populations that are small or sparsely connected will tend to  
 369 lose their most difficult-to-copy traits over time, even if these traits continue to be advantageous  
 370 to their bearers.

371 Empirical support for the hypothesis that population size affects song evolution can be  
 372 found in studies of island populations of songbirds. For example, in a chain of island  
 373 colonizations, chaffinches progressively lost syntactical structure compared with the ancestral  
 374 mainland population [70], and additionally showed simpler phrases and trills than mainland  
 375 chaffinches [71]. Studies of this kind are hard to replicate, as they rely on large-scale  
 376 phylogeographic events, but other researchers have shown rapid changes in songs on islands

[72,73] and in the associated recognition behavior [74]. Some common patterns emerge; for example, in a comparison of 49 pairs of mainland and island species, island species were less likely to sing rattles or trills [75], which are fast, complex sounds and thus potentially the most difficult to reproduce. There are already hints that difficult-to produce-elements (such as trilled notes) may be vulnerable to loss in small wild populations not restricted to islands, as predicted by our model; e.g. golden-crowned sparrows in the furthest northwest breeding population lack terminal trills or buzzes in their songs [58]. Similarly, in the barn swallow, the populations that have the shortest and least complex songs also have the slowest trills [57]. In species of conservation concern, a common pattern when songbirds experience population bottlenecks is the shrinking of repertoire size [73,76,77]. One complication in detecting this pattern in more common species is that apparently small, isolated populations may in fact be in contact with a larger number of potential tutors throughout their lifetime, for example during migration or wintering [78]. Determining the demographic history, as well as the current effective number of tutors, of populations that have slow or no trills, versus those with rapid trills, could provide a test of the hypothesis that trills are lost when population size falls below a certain threshold.

377 A key assumption of Henrich's model is that trait difficulty ( $\alpha$ ) stays constant for a given  
378 trait over time; in reality, a trait may become easier to learn as it simplifies. We modelled this  
379 variation and found an intuitive and important result:  $z$  approaches a minimum value as it  
becomes easier to replicate, enabling the trait to be stably maintained, though in a simpler form  
(small but positive  $z$ ), in small populations that might have lost the trait when  $\alpha$  was constant  
(negative  $z$ ). However, even when trait difficulty ( $\alpha$ ) varies with trait quality ( $z$ ), the trait can be  
lost from the population ( $z$  approaches a stable, but negative, value) under some parameter  
combinations. That simpler renditions of a species-typical song could be copied and maintained  
is consistent with empirical work in swamp sparrows [46], which shows that "poor" copies of  
song (with broken syntax, to accomodate trill rates beyond performance limits) are accepted as  
models by young sparrows and retained in future generations.

380 While population size has often been invoked in human cultural evolutionary theory as a  
381 factor in the maintenance or loss of learned skills [18,19,32,79–85], the existence of a  
382 straightforward relationship between population size and cultural complexity in humans has been

383 contested [86–96]. Empirical research in humans has provided evidence both for  
 384 [79,87,88,90,97–99] and against [94–96,100–103] such a relationship; similarly, there is also  
 385 debate around the relationship between population size and maintenance of a large inventory of  
 386 sounds in language [104–108]. The effects of population size may be complicated by other  
 387 properties of a population, such as migration rates and connectivity, and cultural features such as  
 388 conformity, that are also important to cultural evolution. For example, a recent study showed that  
 389 multiple, partially connected human groups can maintain a higher diversity of solutions to a  
 390 complex problem, and maintaining this heterogeneity of solutions enables more complex  
 391 combinations [109]. This framework offers a promising perspective for investigating the origin  
 392 and maintenance of dialects in many bird species, where spatial heterogeneity in song types can  
 393 persist in the absence of obvious physical barriers.

394         We cannot rule out that there is cultural selection directly on elements of song, as in some  
 395 aspects of human language [110], although there is no reason to suppose this will tend towards  
 396 simplifying songs. Very rapid changes in bird song cultures do occur (e.g. [78]), and in the  
 397 absence of obvious anthropogenic factors, such changes may be tied to cultural selection.  
 398 Anthropogenic changes to the soundscape may also be a major factor in selection on song  
 399 elements in the future, including elements that persist in the absence of noise [111] and may be  
 400 transmitted socially [10]. Although our model does not address the effects of cultural selection or  
 401 biased transmission on birdsong, clearly these mechanisms are extremely important for  
 402 understanding evolution of learned vocalizations.

403         Bird species vary in the relative importance of song for mate attraction (e.g., high in  
 404 zebra finches, [112]) versus territory defense (e.g. high in seaside sparrows, [113]). The strength  
 405 of selection on song, and whether it arises from mate choice or intrasexual competition, likely  
 406 affects how closely the assumptions of this model apply. Species where there is strong directional  
 407 selection on song via mate choice by females, which most closely fits with the classic Fisherian  
 408 runaway model, seem most likely to conform to the predictions we describe above. The stronger  
 409 the link between trait and fitness outcome, the more we might expect song to behave in a  
 410 tool-like way. We encourage researchers interested in vocal learning and other forms of

411 non-human cultural evolution to consider what novel predictions could be made in their system  
412 by embracing this subtle but important change of perspective.

413

# 414 References

415

- 416 1. Heyes CM. 1994 SOCIAL LEARNING IN ANIMALS: CATEGORIES AND  
417 MECHANISMS. *Biological Reviews*. **69**, 207–231.  
418 (doi:10.1111/j.1469-185x.1994.tb01506.x)
- 419 2. Hoppitt W, Laland KN. 2013 *Social Learning: An Introduction to Mechanisms, Methods,*  
420 *and Models*. Princeton University Press.
- 421 3. Hebets EA. 2003 Subadult experience influences adult mate choice in an arthropod:  
422 exposed female wolf spiders prefer males of a familiar phenotype. *Proc. Natl. Acad. Sci. U.*  
423 *S. A.* **100**, 13390–13395.
- 424 4. Verzijden MN, Svensson EI. 2016 Interspecific interactions and learning variability jointly  
425 drive geographic differences in mate preferences. *Evolution* **70**, 1896–1903.
- 426 5. Kacsoh BZ, Bozler J, Bosco G. 2018 Drosophila species learn dialects through communal  
427 living. *PLoS Genet.* **14**, e1007430.
- 428 6. Reiss D, McCowan B. 1993 Spontaneous vocal mimicry and production by bottlenose  
429 dolphins (*Tursiops truncatus*): evidence for vocal learning. *J. Comp. Psychol.* **107**, 301–312.
- 430 7. Whiten A, Goodall J, McGrew WC, Nishida T, Reynolds V, Sugiyama Y, Tutin CEG,  
431 Wrangham RW, Boesch C. 1999 Cultures in chimpanzees. *Nature*. **399**, 682–685.  
432 (doi:10.1038/21415)
- 433 8. Tobias JA, Aben J, Brumfield RT, Derryberry EP, Halfwerk W, Slabbekoorn H, Seddon N.  
434 2010 Song divergence by sensory drive in Amazonian birds. *Evolution* **64**, 2820–2839.
- 435 9. Weir JT, Wheatcroft DJ, Price TD. 2012 The role of ecological constraint in driving the  
436 evolution of avian song frequency across a latitudinal gradient. *Evolution* **66**, 2773–2783.
- 437 10. Moseley DL, Derryberry GE, Phillips JN, Danner JE, Danner RM, Luther DA, Derryberry  
438 EP. 2018 Acoustic adaptation to city noise through vocal learning by a songbird. *Proc. Biol.*  
439 *Sci.* **285**. (doi:10.1098/rspb.2018.1356)
- 440 11. Gil D, Gahr M. 2002 The honesty of bird song: multiple constraints for multiple traits.

441 *Trends in Ecology & Evolution*. **17**, 133–141. (doi:10.1016/s0169-5347(02)02410-2)

442 12. Wilkins MR, Seddon N, Safran RJ. 2013 Evolutionary divergence in acoustic signals:  
443 causes and consequences. *Trends Ecol. Evol.* **28**, 156–166.

444 13. Soma M, Garamszegi LZ. 2011 Rethinking birdsong evolution: meta-analysis of the  
445 relationship between song complexity and reproductive success. *Behavioral Ecology*. **22**,  
446 363–371. (doi:10.1093/beheco/arq219)

447 14. Snyder KT, Creanza N. 2019 Polygyny is linked to accelerated birdsong evolution but not to  
448 larger song repertoires. *Nat. Commun.* **10**, 884.

449 15. Devoogd TJ, Krebs JR, Healy SD, Purvis A. 1993 Relations between song repertoire size  
450 and the volume of brain nuclei related to song: comparative evolutionary analyses amongst  
451 oscine birds. *Proc. Biol. Sci.* **254**, 75–82.

452 16. Spencer KA, Buchanan KL, Goldsmith AR, Catchpole CK. 2004 Developmental stress,  
453 social rank and song complexity in the European starling (*Sturnus vulgaris*). *Proc. Biol. Sci.*  
454 **271 Suppl 3**, S121–3.

455 17. Brenowitz EA, Lent K, Kroodsma DE. 1995 Brain space for learned song in birds develops  
456 independently of song learning. *J. Neurosci.* **15**, 6281–6286.

457 18. Henrich J. 2004 Demography and Cultural Evolution: How Adaptive Cultural Processes  
458 Can Produce Maladaptive Losses—The Tasmanian Case. *American Antiquity*. **69**, 197–214.  
459 (doi:10.2307/4128416)

460 19. Powell A, Shennan S, Thomas MG. 2009 Late Pleistocene demography and the appearance  
461 of modern human behavior. *Science* **324**, 1298–1301.

462 20. Brand CO, Acerbi A, Mesoudi A. 2019 Cultural evolution of emotional expression in 50  
463 years of song lyrics. *Evolutionary Human Sciences* **1**. (doi:10.31235/osf.io/3j6wx)

464 21. Rogers DS, Feldman MW, Ehrlich PR. 2009 Inferring population histories using cultural  
465 data. *Proc. Biol. Sci.* **276**, 3835–3843.

466 22. Steele J, Glatz C, Kandler A. 2010 Ceramic diversity, random copying, and tests for  
467 selectivity in ceramic production. *Journal of Archaeological Science*. **37**, 1348–1358.  
468 (doi:10.1016/j.jas.2009.12.039)

469 23. Carja O, Creanza N. 2019 The evolutionary advantage of cultural memory on  
470 heterogeneous contact networks. *Theor. Popul. Biol.* **129**, 118–125.

471 24. Derex M, Bonnefon J-F, Boyd R, Mesoudi A. 2019 Causal understanding is not necessary  
472 for the improvement of culturally evolving technology. *Nature human behaviour* **3**,  
473 446–452.

- 474 25. Cavalli-Sforza LL, Feldman MW. 1981 Cultural transmission and evolution: a quantitative approach. *Monogr. Popul. Biol.* **16**, 1–388.
- 476 26. Boyd R, Richerson PJ. 1988 *Culture and the Evolutionary Process*. University of Chicago Press.
- 478 27. Creanza N, Kolodny O, Feldman MW. 2017 Cultural evolutionary theory: How culture evolves and why it matters. *Proc. Natl. Acad. Sci. U. S. A.* (doi:10.1073/pnas.1620732114)
- 480 28. Haidle MN. 2016 Lessons from Tasmania – cultural performance versus cultural capacity. *Nature of Culture.* , 7–17. (doi:10.1007/978-94-017-7426-0\_2)
- 482 29. Jones R. 1977 The Tasmanian paradox. *Stone tools as cultural markers: Change, evolution and complexity.* **12**, 189–204.
- 484 30. Diamond J. 1993 Ten thousand years of solitude. *Discover.* **14**, 48.
- 485 31. Vaesen K, Collard M, Cosgrove R, Roebroeks W. 2016 Reply to Henrich et al.: The Tasmanian effect and other red herrings. *Proc. Natl. Acad. Sci. U. S. A.* **113**, E6726–E6727.
- 487 32. Henrich J, Boyd R, Derex M, Kline MA, Mesoudi A, Muthukrishna M, Powell AT, Shennan SJ, Thomas MG. 2016 Understanding cumulative cultural evolution. *Proc. Natl. Acad. Sci. U. S. A.* **113**, E6724–E6725.
- 490 33. Read D. 2011 The Misuse of a Mathematical Model: The Tasmanian Case. *SSRN Electronic Journal* (doi:10.2139/ssrn.2805822)
- 492 34. Ballentine B. 2004 Vocal performance influences female response to male bird song: an experimental test. *Behavioral Ecology.* **15**, 163–168. (doi:10.1093/beheco/arg090)
- 494 35. Wilkins MR, Shizuka D, Joseph MB, Hubbard JK, Safran RJ. 2015 Multimodal signalling in the North American barn swallow: a phenotype network approach. *Proc. Biol. Sci.* **282**, 20151574.
- 497 36. Caro SP, Sewall KB, Salvante KG, Sockman KW. 2010 Female Lincoln’s sparrows modulate their behavior in response to variation in male song quality. *Behavioral Ecology.* **21**, 562–569. (doi:10.1093/beheco/arq022)
- 500 37. Drăgănoiu TI, Nagle L, Kreutzer M. 2002 Directional female preference for an exaggerated male trait in canary (*Serinus canaria*) song. *Proc. Biol. Sci.* **269**, 2525–2531.
- 502 38. Verheyen RF, Eens M, Pinxten R. 1991 Male Song as a Cue for Mate Choice in the European Starling. *Behaviour.* **116**, 210–238. (doi:10.1163/156853991x00049)
- 504 39. Hasselquist D, Bensch S, von Schantz T. 1996 Correlation between male song repertoire, extra-pair paternity and offspring survival in the great reed warbler. *Nature.* **381**, 229–232.



(doi:10.1038/381229a0)

- 506 40. Lambrechts M, Dhondt AA. 1986 Male quality, reproduction, and survival in the great tit (Parus major). *Behavioral Ecology and Sociobiology*. **19**, 57–63. (doi:10.1007/bf00303843)
- 507 41. Vallet E, Kreutzer M. 1995 Female canaries are sexually responsive to special song phrases. *Animal Behaviour*. **49**, 1603–1610. (doi:10.1016/0003-3472(95)90082-9)
- 508 42. Rehsteiner U, Geisser H, Reyer H-U. 1998 Singing and mating success in water pipits: one specific song element makes all the difference. *Animal Behaviour*. **55**, 1471–1481. (doi:10.1006/anbe.1998.0733)
- 509 43. Riebel K, Slater PJB. 1998 Testing female chaffinch song preferences by operant conditioning. *Anim. Behav.* **56**, 1443–1453.
- 510 44. Williams H, Levin II, Ryan Norris D, Newman AEM, Wheelwright NT. 2013 Three decades of cultural evolution in Savannah sparrow songs. *Animal Behaviour*. **85**, 213–223. (doi:10.1016/j.anbehav.2012.10.028)
- 511 45. Lahti DC, Moseley DL, Podos J. 2011 A Tradeoff Between Performance and Accuracy in Bird Song Learning. *Ethology*. **117**, 802–811. (doi:10.1111/j.1439-0310.2011.01930.x)
- 512 46. Podos J, Nowicki S, Peters S. 1999 Permissiveness in the learning and development of song syntax in swamp sparrows. *Animal Behaviour*. **58**, 93–103. (doi:10.1006/anbe.1999.1140)
- 513 47. Soha JA, Marler P. 2000 A species-specific acoustic cue for selective song learning in the white-crowned sparrow. *Anim. Behav.* **60**, 297–306.
- 514 48. Payne RB, Payne LL. 1993 Song copying and cultural transmission in indigo buntings. *Animal Behaviour*. **46**, 1045–1065. (doi:10.1006/anbe.1993.1296)
- 515 49. Clayton NS. 1987 Song tutor choice in zebra finches. *Animal Behaviour*. **35**, 714–721. (doi:10.1016/s0003-3472(87)80107-0)
- 516 50. Henrich J, Gil-White FJ. 2001 The evolution of prestige: freely conferred deference as a mechanism for enhancing the benefits of cultural transmission. *Evol. Hum. Behav.* **22**, 165–196.
- 517 51. Cheng JT, Tracy JL, Henrich J. 2011 Dominance and prestige: Distinct routes to social influence. *PsycEXTRA Dataset*. (doi:10.1037/e527772014-876)
- 518 52. Baldini R. 2012 Success-biased social learning: cultural and evolutionary dynamics. *Theor. Popul. Biol.* **82**, 222–228.
- 519 53. Podos J. 1997 A Performance Constraint on the Evolution of Trilled Vocalizations in a Songbird Family (Passeriformes: Emberizidae). *Evolution*. **51**, 537. (doi:10.2307/2411126)



- 520 54. Kort SR de, de Kort SR, Eldermire ERB, Cramer ERA, Vehrencamp SL. 2009 The deterrent effect of bird song in territory defense. *Behavioral Ecology*. **20**, 200–206. (doi:10.1093/beheco/arn135)
- 521 55. Illes AE, Hall ML, Vehrencamp SL. 2006 Vocal performance influences male receiver response in the banded wren. *Proc. Biol. Sci.* **273**, 1907–1912.
- 522 56. Phillips JN, Derryberry EP. 2017 Vocal performance is a salient signal for male–male competition in White-crowned Sparrows. *The Auk*. **134**, 564–574. (doi:10.1642/auk-17-2.1)
- 523 57. Wilkins MR, Scordato ESC, Semenov GA, Karaardıç H, Shizuka D, Rubtsov A, Pap PL, Shen S-F, Safran RJ. 2018 Global song divergence in barn swallows (*Hirundo rustica*): exploring the roles of genetic, geographical and climatic distance in sympatry and allopatry. *Biological Journal of the Linnean Society*. **123**, 825–849. (doi:10.1093/biolinnee/bly012)
- 524 58. Shizuka D, Ross Lein M, Chilton G. 2016 Range-wide patterns of geographic variation in songs of Golden-crowned Sparrows (*Zonotrichia atricapilla*). *The Auk*. **133**, 520–529. (doi:10.1642/auk-16-27.1)
- 525 59. Searfoss AM, Liu W-C, Creanza N. 2020 Geographically well-distributed citizen science data reveals range-wide variation in the chipping sparrow’s simple song. *Anim. Behav.* **161**, 63–76.
- 526 60. Podos J. 1996 Motor constraints on vocal development in a songbird. *Animal Behaviour*. **51**, 1061–1070. (doi:10.1006/anbe.1996.0107)
- 527 61. Podos J. 2001 Correlated evolution of morphology and vocal signal structure in Darwin’s finches. *Nature*. **409**, 185–188. (doi:10.1038/35051570)
- 528 62. Konishi M. 1970 Comparative neurophysiological studies of hearing and vocalizations in songbirds. *Zeitschrift für Vergleichende Physiologie*. **66**, 257–272. (doi:10.1007/bf00297829)
- 529 63. Prather J, Peters S, Mooney R, Nowicki S. 2012 Sensory Constraints on Birdsong Syntax: Neural Responses to Swamp Sparrow Songs with Accelerated Trill Rates. *Anim. Behav.* **83**, 1411–1420.
- 530 64. Robinson CM, Creanza N. 2019 Species-level repertoire size predicts a correlation between individual song elaboration and reproductive success. *Ecol. Evol.* **9**, 8362–8377.
- 531 65. Soma M, Takahasi M, Ikebuchi M, Yamada H, Suzuki M, Hasegawa T, Okanoya K. 2006 Early Rearing Conditions Affect the Development of Body Size and Song in Bengalese Finches. *Ethology*. **112**, 1071–1078. (doi:10.1111/j.1439-0310.2006.01263.x)
- 532 66. Kobayashi Y, Aoki K. 2012 Innovativeness, population size and cumulative cultural evolution. *Theor. Popul. Biol.* **82**, 38–47.

- 533 67. Doupe AJ, Kuhl PK. 1999 Birdsong and human speech: common themes and mechanisms. *Annu. Rev. Neurosci.* **22**, 567–631.
- 534 68. Marler P. 1970 Birdsong and speech development: could there be parallels? *Am. Sci.* **58**, 669–673.
- 535 69. Oikkonen J, Onkamo P, Järvelä I, Kanduri C. 2016 Convergent evidence for the molecular basis of musical traits. *Sci. Rep.* **6**, 39707.
- 536 70. Lachlan RF, Verzijden MN, Bernard CS, Jonker P-P, Koese B, Jaarsma S, Spoor W, Slater PJB, ten Cate C. 2013 The Progressive Loss of Syntactical Structure in Bird Song along an Island Colonization Chain. *Current Biology.* **23**, 1896–1901. (doi:10.1016/j.cub.2013.07.057)
- 537 71. Marler BP, Boatman DJ. 1951 OBSERVATIONS ON THE BIRDS OF PICO, AZORES. *Ibis* **93**, 90–99.
- 538 72. Baker MC, Baker MSA, Baker EM. 2003 Rapid evolution of a novel song and an increase in repertoire size in an island population of an Australian songbird. *Ibis.* **145**, 465–471. (doi:10.1046/j.1474-919x.2003.00190.x)
- 539 73. Parker KA, Anderson MJ, Jenkins PF, Brunton DH. 2012 The effects of translocation-induced isolation and fragmentation on the cultural evolution of bird song. *Ecol. Lett.* **15**, 778–785.
- 540 74. Parker KA, Hauber ME, Brunton DH. 2010 Contemporary cultural evolution of a conspecific recognition signal following serial translocations. *Evolution* **64**, 2431–2441.
- 541 75. Morinay J, Cardoso GC, Doutrelant C, Covas R. 2013 The evolution of birdsong on islands. *Ecol. Evol.* **3**, 5127–5140.
- 542 76. Crates R, Langmore N, Ranjard L, Stojanovic D, Rayner L, Ingwersen D, Heinsohn R. 2021 Loss of vocal culture and fitness costs in a critically endangered songbird. *Proc. Biol. Sci.* **288**, 20210225.
- 543 77. Laiolo P, Tella JL. 2007 Erosion of animal cultures in fragmented landscapes. *Frontiers in Ecology and the Environment.* **5**, 68–72. (doi:10.1890/1540-9295(2007)5[68:eoacif]2.0.co;2)
- 544 78. Otter KA, Mckenna A, LaZerte SE, Ramsay SM. 2020 Continent-wide Shifts in Song Dialects of White-Throated Sparrows. *Current Biology.* **30**, 3231–3235.e3. (doi:10.1016/j.cub.2020.05.084)
- 545 79. Carlino GA, Chatterjee S, Hunt RM. 2007 Urban density and the rate of invention. *J. Urban Econ.* **61**, 389–419. (doi:10.1016/j.jue.2006.08.003)
- 546 80. Bentley RA, O’Brien MJ. 2011 The selectivity of social learning and the tempo of cultural

evolution. *J. Evol. Psychol.* **9**, 125–141. (doi:10.1556/jep.9.2011.18.1)

- 547 81. Kolodny O, Creanza N, Feldman MW. 2015 Evolution in leaps: The punctuated accumulation and loss of cultural innovations. *Proc. Natl. Acad. Sci. U. S. A.* **112**, E6762–9.
- 548 82. Creanza N, Kolodny O, Feldman MW. 2017 Greater than the sum of its parts? Modelling population contact and interaction of cultural repertoires. *J. R. Soc. Interface* **14**. (doi:10.1098/rsif.2017.0171)
- 549 83. Fogarty L, Creanza N. 2017 The niche construction of cultural complexity: interactions between innovations, population size and the environment. *Philos. Trans. R. Soc. Lond. B Biol. Sci.* **372**. (doi:10.1098/rstb.2016.0428)
- 550 84. Shennan S. 2001 Demography and Cultural Innovation: a Model and its Implications for the Emergence of Modern Human Culture. *Cambridge Archaeological Journal.* **11**, 5–16. (doi:10.1017/s0959774301000014)
- 551 85. Strassberg SS, Creanza N. 2021 Cultural evolution and prehistoric demography. *Philos. Trans. R. Soc. Lond. B Biol. Sci.* **376**, 20190713.
- 552 86. Derex M, Beugin M-P, Godelle B, Raymond M. 2013 Experimental evidence for the influence of group size on cultural complexity. *Nature.* **503**, 389–391. (doi:10.1038/nature12774)
- 553 87. Collard M, Ruttle A, Buchanan B, O’Brien MJ. 2013 Population Size and Cultural Evolution in Nonindustrial Food-Producing Societies. *PLoS ONE.* **8**, e72628. (doi:10.1371/journal.pone.0072628)
- 554 88. Kline MA, Boyd R. 2010 Population size predicts technological complexity in Oceania. *Proc. R. Soc. B.* **277**, 2559–2564. (doi:10.1098/rspb.2010.0452)
- 555 89. Carlino GA, Chatterjee S, Hunt RM. 2007 Urban density and the rate of invention. *J. Urban Econ.* **61**, 389–419. (doi:10.1016/j.jue.2006.08.003)
- 556 90. Bettencourt LMA, Lobo J, Helbing D, Kuhnert C, West GB. 2007 Growth, innovation, scaling, and the pace of life in cities. *Proc. Natl. Acad. Sci. U. S. A.* **104**, 7301–7306. (doi:10.1073/pnas.0610172104)
- 557 91. Premo LS, Kuhn SL. 2010 Modeling effects of local extinctions on culture change and diversity in the Paleolithic. *PLoS One.* **5**, e15582. (doi:10.1371/journal.pone.0015582)
- 558 92. Read D. 2006 Tasmanian knowledge and skill: maladaptive imitation or adequate technology? *Am. Antiq.* **71**, 164–184. (doi:10.2307/40035327)
- 559 93. Querbes A, Vaesen K, Houkes W. 2014 Complexity and demographic explanations of cumulative culture. *PLoS ONE.* **9**, e102543. (doi:10.1371/journal.pone.0102543)

- 560 94. Vaesen K, Collard M, Cosgrove R, Roebroeks W. 2016 Population size does not explain past changes in cultural complexity. *Proc. Natl. Acad. Sci. U. S. A.* **113**, E2241–E2247. (doi:10.1073/pnas.1520288113)
- 561 95. Buchanan B, O’Brien MJ, Collard M. 2016 Drivers of technological richness in prehistoric Texas: an archaeological test of the population size and environmental risk hypotheses. *Archaeol. Anthropol. Sci.* **8**, 625–634. (doi:10.1007/s12520-015-0245-4)
- 562 96. Nelson MC, Hegmon M, Kulow SR, Peebles MA, Kintigh KW, Kinzig AP. 2011 Resisting diversity: a long-term archaeological study. *Ecol. Soc.* **16**. (doi:10.5751/es-03887-160125)
- 563 97. Carneiro RL. 1967 On the Relationship between Size of Population and Complexity of Social Organization. *Southwest. J. Anthropol.* **23**, 234–243.
- 564 98. Collard M, Buchanan B, Ruttle A, O’Brien MJ. 2011 Niche construction and the toolkits of Hunter–gatherers and food producers. *Biol. Theory* **6**, 251–259.
- 565 99. Marquet PA, Santoro CM, Latorre C, Standen VG, Abades SR, Rivadeneira MM, Arriaza B, Hochberg ME. 2012 Emergence of social complexity among coastal hunter-gatherers in the Atacama Desert of northern Chile. *Proc. Natl. Acad. Sci. U. S. A.* **109**, 14754–14760.
- 566 100. Collard M, Buchanan B, O’Brien MJ, Scholnick J. 2013 Risk, mobility or population size? Drivers of technological richness among contact-period western North American hunter–gatherers. *Philos. Trans. R. Soc. Lond. B Biol. Sci.* **368**, 20120412.
- 567 101. Collard M, Buchanan B, O’Brien MJ. 2013 Population Size as an Explanation for Patterns in the Paleolithic Archaeological Record: More Caution Is Needed. *Curr. Anthropol.* **54**, S388–S396.
- 568 102. Collard M, Kemery M, Banks S. 2005 Causes of Toolkit Variation Among Hunter-Gatherers: A Test of Four Competing Hypotheses. *Canadian Journal of Archaeology / Journal Canadien d’Archéologie* **29**, 1–19.
- 569 103. Acerbi A, Kendal J, Tehrani JJ. 2017 Cultural complexity and demography: The case of folktales. *Evol. Hum. Behav.* **38**, 474–480.
- 570 104. Atkinson QD. 2011 Phonemic diversity supports a serial founder effect model of language expansion from Africa. *Science* **332**, 346–349.
- 571 105. Creanza N, Ruhlen M, Pemberton TJ, Rosenberg NA, Feldman MW, Ramachandran S. 2015 A comparison of worldwide phonemic and genetic variation in human populations. *Proceedings of the National Academy of Sciences.* **112**, 1265–1272. (doi:10.1073/pnas.1424033112)
- 572 106. Hay J, Bauer L. 2007 Phoneme inventory size and population size. *Language* **83**, 388–400.
- 573 107. Moran S, McCloy D, Wright R. 2012 Revisiting population size vs. phoneme inventory

size. *Language* **88**, 877–893.

- 574 108. Donohue M, Nichols J. 2011 Does phoneme inventory size correlate with population size? *Linguist. typology* **15**. (doi:10.1515/lity.2011.011)
- 575 109. Derex M, Boyd R. 2016 Partial connectivity increases cultural accumulation within groups. *Proc. Natl. Acad. Sci. U. S. A.* **113**, 2982–2987.
- 576 110. Newberry MG, Ahern CA, Clark R, Plotkin JB. 2017 Detecting evolutionary forces in language change. *Nature* **551**, 223–226.
- 577 111. Reichard DG, Atwell JW, Pandit MM, Cardoso GC, Price TD, Ketterson ED. In press. Urban birdsongs: higher minimum song frequency of an urban colonist persists in a common garden experiment. (doi:10.1101/761734)
- 578 112. Riebel K. 2009 Chapter 6 Song and Female Mate Choice in Zebra Finches: A Review. *Advances in the Study of Behavior.* , 197–238. (doi:10.1016/s0065-3454(09)40006-8)
- 579 113. McDonald MV. 1989 Function of song in Scott’s seaside sparrow, *Ammodramus maritimus* peninsulae. *Animal Behaviour.* **38**, 468–485. (doi:10.1016/s0003-3472(89)80040-5)

580
